# Supplementary material for: Enzymatic Functionalization of Wood as an Antifouling Strategy against the Marine Bacterium Cobetia marina
Source: MDPI journal article supplement (doi:10.3390/polym13213795), 2021-11-02
Supplement: s1 [file s1]

# Enzymatic functionalization of wood as an antifouling strategy against the marine bacterium *Cobetia marina*

Daniel Filgueira <sup>1,2</sup>, Cristian Bolaño <sup>1</sup>, Susana Gouveia <sup>1</sup>, Diego Moldes <sup>1,\*</sup>

<sup>1</sup> CINTECX, Department of Chemical Engineering, Campus Universitario As Lagoas-Marcosende, Universidade de Vigo, E-36310, Vigo, Spain; damfilgueira@hotmail.com; cbolaño@uvigo.es; gouveia@uvigo.es

<sup>2</sup> TECNALIA, Basque Research and Technology Alliance (BRTA), Area Anardi 5, 20730, Azpeitia, Spain; daniel.martinez@tecnalia.com

\* Research Group of Bioengineering and Sustainable Processes, Department of Chemical Engineering, Edificio Fundición, Lagoas Marcosende s/n, University of Vigo, 36310, Vigo (Spain); diego@uvigo.es

**Corresponding author:** diego@uvigo.es

## Contents

2 pages

1 Table

# TABLES

**Table S1.** Treatment conditions for the enzymatic grafting of lauryl gallate (LG) on beech veneers tested in the experiment design.

| [LG] | Laccase dose             | Time of reaction |
|------|--------------------------|------------------|
| mM   | (U/cm <sup>2</sup> wood) | (h)              |
| 5    | 6.72                     | 2                |
| 5    | 5.0                      | 2                |
| 2.5  | 5.0                      | 4                |
| 5    | 3.36                     | 1                |
| 5    | 6.72                     | 4                |
| 5    | 3.36                     | 2                |
| 5    | 3.36                     | 4                |
| 2.5  | 6.72                     | 1                |
| 2.5  | 6.72                     | 2                |
| 10   | 6.72                     | 4                |
| 5    | 5.0                      | 4                |
| 2.5  | 3.36                     | 2                |
| 5    | 6.72                     | 1                |
| 10   | 3.36                     | 2                |
| 10   | 3.36                     | 4                |
| 2.5  | 6.72                     | 4                |
| 2.5  | 3.36                     | 1                |
| 10   | 3.36                     | 1                |
| 10   | 5.0                      | 1                |
| 10   | 5.0                      | 4                |
| 2.5  | 5.0                      | 1                |
| 2.5  | 3.36                     | 4                |
| 10   | 5.0                      | 2                |
| 10   | 6.72                     | 1                |
| 5    | 5.0                      | 1                |
| 2.5  | 5.0                      | 2                |
| 10   | 6.72                     | 2                |
